# Supplementary material for: Performance of Graphene/Polydimethylsiloxane Surfaces against S. aureus and P. aeruginosa Single- and Dual-Species Biofilms
Source: MDPI journal article supplement (doi:10.3390/nano12030355), 2022-01-22
Supplement: s1 [file s1]

## Supplementary material

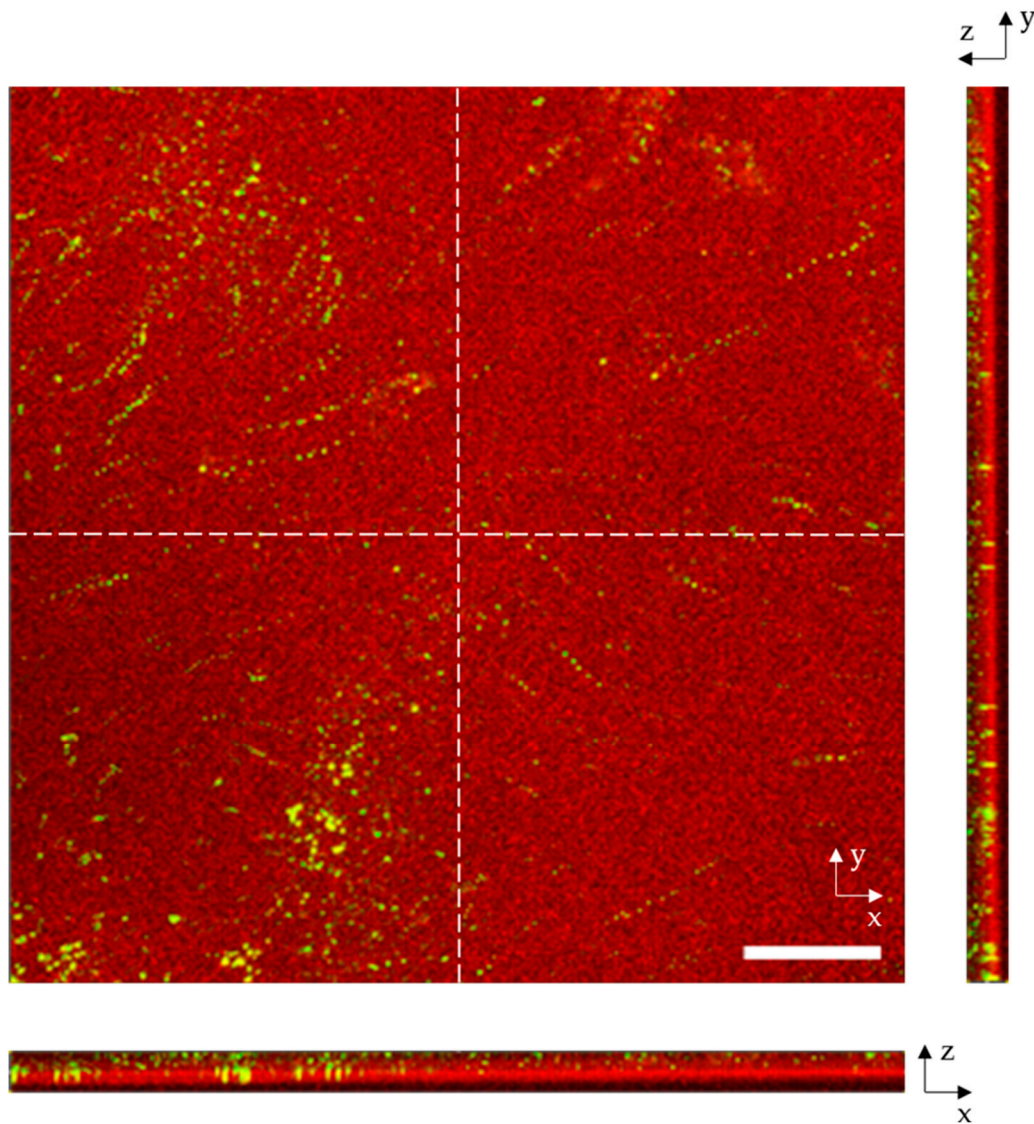

**Figure S1:** Spatial heterogeneity of dual-species biofilms of *P. aeruginosa* (labeled by the red fluorescent protein mCherry) and *S. aureus* (countermarked in green with Syto9) formed on 5 wt% GNP/PDMS; sections views of the CLSM image presented in Figure 6f. Dotted white lines indicate vertical sections. The scale bar is 100  $\mu\text{m}$ .

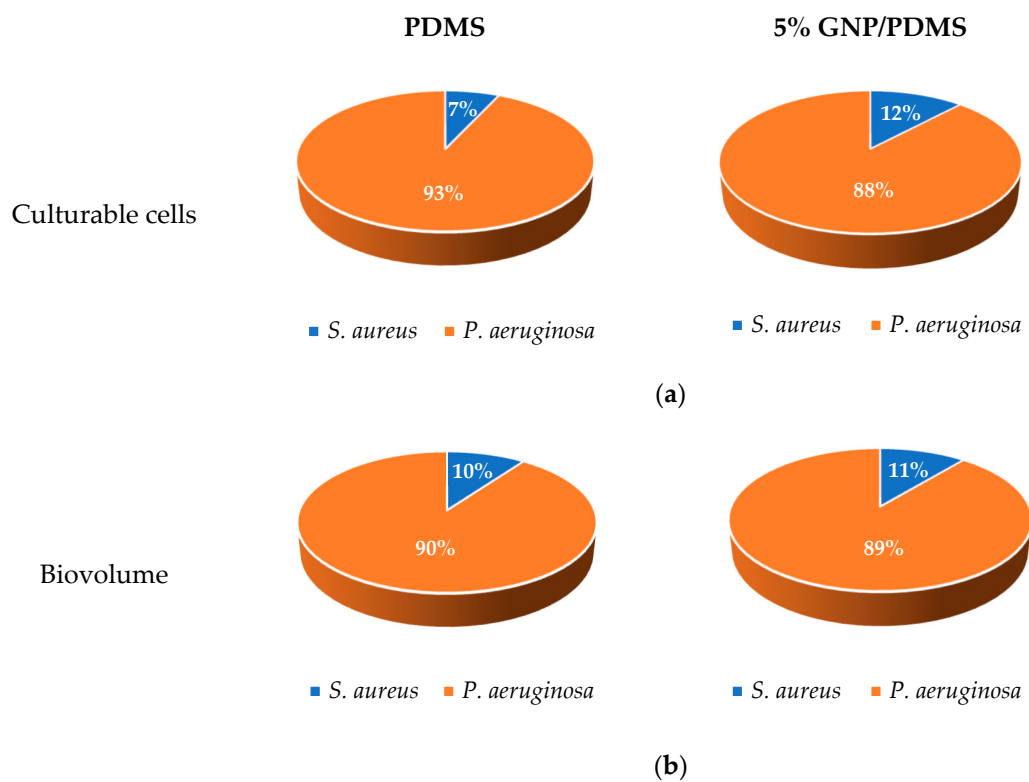

**Figure S2:** Proportion of *S. aureus* (in blue) and *P. aeruginosa* (in orange) (a) culturable cells and (b) biovolume in dual-species biofilms formed on 5 wt% GNP/PDMS surfaces.
